# Supplementary material
Source: ML conference proceedings conference paper supplement (https://openaccess.thecvf.com/content/ICCV2025/html/Li_LLM_Thought_Divergence_ICCV_2025_paper.html)
Supplement: Supplementary file 1 [file Li_LLM_Thought_Divergence_ICCV_2025_supplemental.pdf]

# LaTeX LLM Thought Divergence and Convergence for Dialogue-Based Image Generation Control

## Supplementary Material

### 001 A. Full Prompt for Step-by-Step Thought

002 1 # 1. Task  
003 2 Your task is to give the correct next  
004 3 step.  
005 4 # 2. Problem Define  
006 5 Given a problem of "Generate a prompt  
007 6 for image generation model like Stable  
008 7 Diffusion, based on the dialogue.", and  
009 8 an existing partial solution (not a  
010 9 complete answer).  
011 10 # 3. Example of input and output  
012 11 Assuming the input is n-steps, then the  
013 12 format of the input is:  
014 13 "Problem: ...  
015 14 Existing Steps:  
016 15 Step 1: ...  
017 16 Step 2: ...  
018 17 ...  
019 18 Step n: ..."  
020 19 where ... denotes omitted input  
021 20 information.  
022 The output format is limited to:  
023 "Next step: ..."  
024 where ... indicates omitted output  
025 information, which is the part you  
026 should fill in. Your output should be a  
027 complete reasoning step that includes  
028 calculations, reasoning, choosing  
029 answers, etc.  
030 Here is the input, please follow the  
031 restricted output format.  
032 "Problem:"  
033 # 4. Exception haddle  
034 If no existing steps are provided, you  
035 need to briefly analyze the problem from  
036 scratch and then output the first step.  
037 Otherwise, you need to output the next  
038 step (step n+1) that you think is  
039 correct, following the ideas and  
040 analysis of the existing steps.

image generation prompts based on user  
input:  
# 3. Example of output  
The output format is limited to:  
"Analysis:... \nPrompt:...", where ...  
indicates omitted output information,  
which is the part you should fill in.  
"User Input:"

### C. Full Prompt for Evaluation

# 1. Task  
Please check if the images match the  
descriptions in the conversation,  
examining round by round.  
# 2. Problem Define  
Given the dialogue below, provide an  
analysis and scoring.  
# 3. Value Calculate Equation  
Calculate the proportion of correct  
dialogue rounds relative to the total  
number of rounds  
# 4. Example of output  
Given a dialogue below, provide analyze  
and scoring. Do not include the  
dialogue content in the analysis, and  
base the rating strictly on the provided  
input.  
The output format must strictly be: "  
Analysis:... \nScore:..." where ...  
represents your content.  
"Dialogue:"  
# 5. Exception haddle  
The score should be a decimal between 0  
and 1. If all existing conversation  
rounds are completely incorrect (every  
step is wrong), give 0.

### 041 B. Full Prompt for Image Generation

042 1 # 1. Task  
043 2 You are a professional multimodal  
044 3 prompt engineer.  
045 4 # 2. Problem Define  
046 5 Follow these steps to create a max of  
047 6 77 token Stable-Diffusion-optimized
